1 The adaptive value of tandem communication in ants: insights  
2 from an agent-based model

3 Natascha Goy<sup>1</sup>, Simone M. Glaser<sup>1</sup> & Christoph Grüter<sup>1,2</sup>

4 <sup>1</sup>Institute of Organismic and Molecular Evolutionary Biology, Johannes-Gutenberg University  
5 of Mainz, Mainz, Germany.

6 <sup>2</sup>Present address: School of Biological Sciences, University of Bristol, 24 Tyndall Avenue,  
7 BS8 1TQ Bristol, UK

8

9 **Correspondence:** goyna@students.uni-mainz.de

10 **Keywords:** communication, tandem running, agent-based model, *Temnothorax nylanderi*

11

12

13

14

15

16

17

18

19

## 20 **Abstract**

21 Social animals often share information about the location of resources, such as a food source or  
22 a new nest-site. One well-studied communication strategy in ants is tandem running, whereby  
23 a leader guides a recruit to a resource. Tandem running is considered an example of animal  
24 teaching because a leader adjusts her behaviour and invests time to help another ant to learn the  
25 location of a resource more efficiently. Tandem running also has costs, such as waiting inside  
26 the nest for a leader and a reduced walking speed. Whether and when these costs outweigh the  
27 benefits of tandem running is not well understood. We developed an agent-based simulation  
28 model to investigate the conditions that favour communication by tandem running during  
29 foraging. We predicted that the spatio-temporal distribution of food sources, colony size and  
30 the ratio of scouts and recruits affect colony foraging success. Our results suggest that  
31 communication is favoured when food sources are hard to find, of variable quality and long  
32 lasting. These results mirror the findings of simulations of honeybee communication. Scouts  
33 locate food sources faster than tandem followers in some environments, suggesting that tandem  
34 running may fulfil the criteria of teaching only in some situations. Furthermore, tandem running  
35 was only beneficial above a critical colony size threshold. Taken together, our model suggests  
36 that there is a considerable parameter range that favours colonies that do not use communication,  
37 which could explain why many social insects with small colony sizes forage solitarily.

38

## 39 **Introduction**

40 Finding food is critical for survival and reproduction, but also energy- and time-consuming.  
41 Foraging for food can be done independently or by using information provided by other  
42 organisms (Sumpter 2010; Hoppitt and Laland 2013). In social insects, such as ants, social bees  
43 or social wasps, new food sources are usually discovered by scouts that explore the environment

44 on their own (Hölldobler and Wilson 1990; Seeley 1995). After finding a profitable food source,  
45 they return to their nest and often communicate their discovery to nestmates. The communicated  
46 information depends on the species, but often includes the location of the resource, e.g. by  
47 means of laying a pheromone trail (Hölldobler and Wilson 1990; Jarau and Hrnčir 2009;  
48 Czaczkes et al. 2015b). Recruitment communication allows colonies to exploit profitable  
49 feeding sites fast, e.g. before competitors have discovered and consumed the food source. Once  
50 the foragers have learned the location of the food source, they can use their route memory to  
51 return to the feeding site (e.g. von Frisch 1967; Collett et al. 2013).

52 In social insects, foraging strategies should not only take into account short-term  
53 individual success, but also how they affect colony foraging success. Thus, the value of  
54 communication should ultimately be studied at the colony level. So far, most theoretical and  
55 empirical studies that explored the value of communication for colony foraging success have  
56 focused on honeybees (but see also e.g. Sumpter and Pratt 2003; Dechaume-Moncharmont et  
57 al. 2005; Czaczkes et al. 2015a). These studies suggest that the value of communicating the  
58 location of food sources by means of waggle dances depends on how food sources are  
59 distributed (Sherman and Visscher 2002; Dornhaus and Chittka 2004; Dornhaus et al. 2006;  
60 Beekman and Lew 2008; Donaldson-Matasci and Dornhaus 2012; Schürch and Grüter 2014;  
61 I'Anson Price et al. 2019; reviewed in I'Anson Price and Grüter 2015). For example, Beekman  
62 & Lew (2008) found that the value of the “dance language” (the spatial information provided  
63 by the waggle dance) depends on the size and distance of the food patches. When patches were  
64 large and close to the hive, colonies that did not use dance communication and instead followed  
65 an individual foraging strategy were more successful. Dornhaus et al. (2006) concluded that  
66 dance communication does not help colonies collect more energy if there are many food sources  
67 that vary little in quality. Their models suggest that communication is beneficial if high-quality  
68 food sources are available, but are hard to find and that dance communication could be

69 detrimental if food sources are easy to find (see also Dechaume-Moncharmont et al. 2005). In  
70 the latter case, foragers should search for new food sources through scouting (independent  
71 search) and return to known high-quality food sources using route memory (Schürch and Grüter  
72 2014).

73         There is a well-known, but not yet fully understood link between colony size and the  
74 method of recruitment in ants (Beckers et al. 1989; Planqué et al. 2010; Dornhaus et al. 2012).  
75 While large colony size is associated with pheromone-based mass-recruitment, species with  
76 smaller colony sizes often forage solitarily or they use a recruitment method called tandem  
77 running (Beckers et al. 1989). In tandem running, an experienced ant (tandem leader) guides an  
78 inexperienced nestmate (tandem follower) to a new nest-site or a rewarding food source  
79 (Hingston 1929; Wilson 1959; Möglich et al. 1974; Franks and Richardson 2006; Pratt 2008;  
80 Kaur et al. 2017; reviewed in Franklin 2014). It has been argued that tandem followers locate  
81 resources quicker than scouts that search for resources by individual exploration and trial-and-  
82 error learning (Franks and Richardson 2006). Additionally, ants that are recruited by a tandem  
83 leader might find food sources of higher quality because foragers are more likely to perform  
84 tandem runs after finding a better food source (Shaffer et al. 2013). On the other hand, tandem  
85 running also has disadvantages. During a tandem run, both ants walk with reduced speed  
86 (Franks and Richardson 2006; Kaur et al. 2017) and a substantial proportion of tandem runs fail  
87 (e.g. Wilson 1959; Pratt 2008; Glaser and Grüter 2018; Grüter et al. 2018). Furthermore,  
88 recruits experience time and opportunity costs as they wait inside their nest for a leader, rather  
89 than search in the environment for food sources by themselves. These disadvantages could  
90 explain why some ant species do not seem to use tandem communication when foraging, even  
91 though tandem runs are used during colony migrations (Hölldobler 1984; Traniello and  
92 Hölldobler 1984; Fresneau 1985; Maschwitz et al. 1986). More generally, a sizeable group of  
93 ant species do not seem to use any form of communication during foraging (e.g. Beckers et al.

94 1989; Lanan 2014; Reeves and Moreau 2019). This raises the question whether, when and how  
95 a communication method that is relatively slow and small-scale, like tandem running, improves  
96 colony foraging success and whether the ecological circumstances that favour tandem running  
97 match those that favour honeybee dance communication.

98 We developed an agent-based simulation model to investigate the importance of  
99 recruitment communication in the form of tandem running for the foraging success of virtual  
100 ant colonies. We compared colonies that could perform tandem runs with colonies that  
101 consisted only of scouts, *i.e.* without tandem running in an environment that varied in the  
102 number, quality, distance and longevity of food sources. Additionally, we tested whether colony  
103 size affects the importance of communication for colony foraging success. Finally, we explored  
104 the role of forager ratio (relative numbers of scouts and recruits) and tested if recruits indeed  
105 locate food sources faster than scouts. Based on studies that simulated honeybee foraging, we  
106 predicted that tandem running is beneficial when high quality food sources are hard to find  
107 (Dornhaus et al. 2006; Beekman and Lew 2008), but is detrimental to colony success when food  
108 sources are short-lived (Schürch and Grüter 2014). We also predicted that larger colonies  
109 benefit more from tandem running.

110

## 111 **The agent-based simulation model**

112 An agent-based simulation model (ABM) was developed using the software Netlogo 6.1.1  
113 (Wilensky 1999, Wilensky and Rand 2015) (the NetLogo file can be found in the online  
114 material). The model simulates the foragers of an artificial ant colony in an environment  
115 consisting of their nest and food sources. Some of the basic parameters, like the range of colony  
116 sizes, walking speeds or energy collected by foragers were derived from the ant species  
117 *Temnothorax nylanderi* (Glaser and Grüter 2018).

118

119 *Purpose*

120 The aim of our model was to explore the adaptive value of tandem running in ants by measuring  
121 the colony foraging success (as gained energy) and the time required by foragers to find a food  
122 source. We compared colonies that could perform tandem runs with colonies that consisted only  
123 of scouts, *i.e.* without tandem running. This latter situation is found in many ant species with  
124 small colony sizes, such as *Diacamma* or *Neoponera* (Hölldobler 1984, Traniello and  
125 Hölldobler 1984, Fresneau 1985, R. Kaur, pers. communication). In both situations, foragers  
126 could also use route memory (or private information) to return to food sources they visited in  
127 the past. We assessed the effects of communication depending on food source distribution  
128 (number, distance), their quality and stability as well as colony size and the scout-recruit ratio.  
129

130 *Entities, state variables and scale*

131 Netlogo operates with patches that can be used to measure distances and ticks for time steps. In  
132 our model, 1 tick is equivalent to 1 second and 1 patch to 1 cm. The agents operate in a two-  
133 dimensional square grid of 140×140 patches (arena) with a nest and either 2 or 10 food sources  
134 (FS). This simulated environments with few or many food sources. The nest is located in the  
135 center ( $x=0, y=0$ ), with a radius of 10 patches. The food patches were at a distance of either 40  
136 (default) or 20 patches from the outer edge of the nest, simulating natural conditions as *T.*  
137 *nylanderi* mostly forages within 50 cm from their nest (Heinze et al. 1996). Each food source  
138 had a size of 1 patch, which could represent a dead insect or a drop of honey dew, and could  
139 either be of high or low quality ( $FS_{high}$  and  $FS_{low}$ ), simulating a sugar solution of either 1 molar  
140 or 0.1 molar concentration.

141 Since all agents are foragers, our default colony size of 100 would correspond to a  
142 natural colony consisting of ~300-400 workers, assuming that foragers account for about 20-  
143 30% of a *Temnothorax* colony (e.g. Shaffer et al. 2013). Simulated colonies consisted of varying

144 ratios of scouts that search for resources independently and recruits that waited in the nest until  
 145 they are recruited to a food source. The default scout-recruit ratio was 1:4 (*i.e.* 20 scouts + 80  
 146 recruits in the default situation), similar to what has been observed in honeybees where scouts  
 147 represent about 5-35 % of the colony (von Frisch 1967; Seeley 1995). In colonies without  
 148 tandem running, all foragers were scouts. In the default configuration, scouts and recruits can  
 149 both assume any of the following seven states: (1) idle inside the nest, (2) feeding at food  
 150 sources, (3) returning to the nest with food, (4) unloading food, (5) searching for a follower  
 151 inside the nest, (6) leading a tandem run to the food source or (7) returning alone to the food  
 152 source (*i.e.* use private information). Additionally, scouts search for food sources independently,  
 153 while recruits wait inside the nest for a tandem leader. Recruits can then follow tandem runs to  
 154 a food source (Fig. 1).

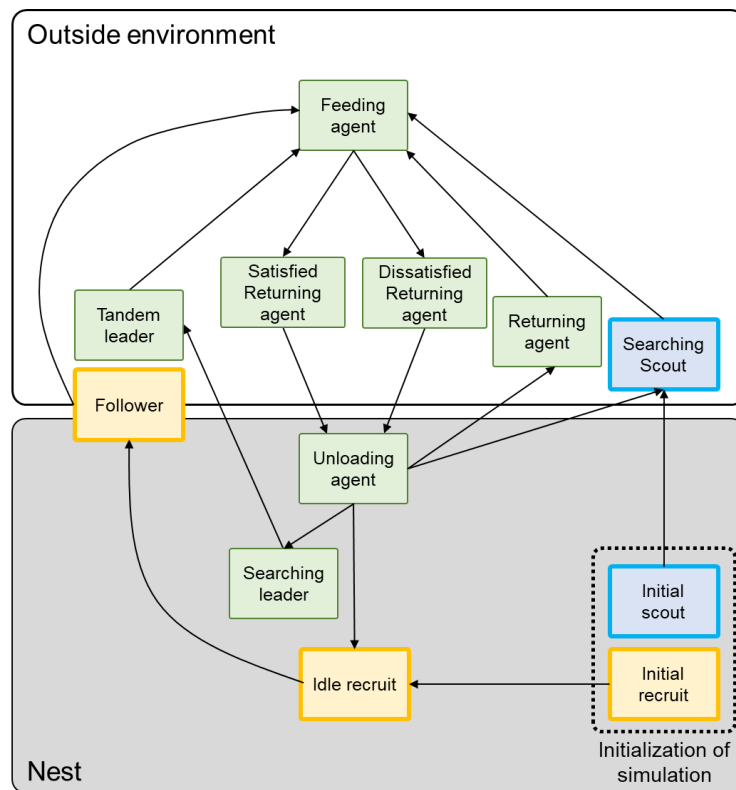

155  
 156 **Fig. 1.** State diagram for the agent-based model for colonies with tandem runs. All foragers  
 157 start inside the nest. Green boxes represent agent states that are possible for both scouts and

158 recruits, blue boxes are states that are only possible for scouts and orange boxes represent  
 159 states that are only possible for recruits.

160

161 Colonies gain nest energy (NE) when agents return to the nest and “unload” the energy  
 162 gained at food sources. We estimated the energy content of a crop load of a *T. nylanderii* forager  
 163 the following way: we measured foragers (N = 21, from 3 colonies) and estimated that full  
 164 foragers carry ~0.15 mg of sugar solution. Given the energetic value of sucrose, we calculated  
 165 that a forager feeding at a 1 molar sucrose solution collects ~0.75 Joule per foraging trip,  
 166 whereas a forager feeding at a 0.1 molar solution would obtain ~0.075 J.

167

168 **Table 1: Overview of the model parameters and the used values**

| Variables           | Description                                                                              | Default values                | Other values tested                              |
|---------------------|------------------------------------------------------------------------------------------|-------------------------------|--------------------------------------------------|
| FS distance         | Distance from nest centre to food source                                                 | 40                            | 20                                               |
| FS number           | Number of food sources                                                                   | 2 or 10                       |                                                  |
| Colony size         | Number of agents (foragers) in a colony                                                  | 100                           | 20-200                                           |
| Scout-recruit ratio | The ratio of scouts and recruits in a colony                                             | 1:4 (r = 0.2) or (all scouts) | 1:9 to 10:0 (r = 0.1 to 1.0)                     |
| FS <sub>High</sub>  | Energy gained from the high-quality food source                                          | 0.75 J                        |                                                  |
| FS <sub>Low</sub>   | Energy gained from the low-quality food source                                           | 0.075 J                       |                                                  |
| $t_{max}$           | Duration of a simulation (1 tick ~ 1 second)                                             | 5400 ticks                    | 21600 ticks                                      |
| $v_{outside}$       | Walking velocity of ants outside the nest                                                | 0.8 patch/ticks               |                                                  |
| $v_{nest}$          | Walking velocity of ants inside the nest                                                 | 0.1 patch/ticks               |                                                  |
| $v_{tandem}$        | Walking velocity of Tandem leader and Tandem follower towards the respective food source | 0.4 patch/ticks               |                                                  |
| $M_{cost}$          | Metabolic or energy cost of walking outside                                              | $2.446 \times e^{-7}$ J/tick  | $2.446 \times e^{-6}$ ,<br>$2.446 \times e^{-8}$ |
| $t_{scouts}$        | Time a scout searches food before returning to nest                                      | 600-900 ticks                 |                                                  |
| $t_{nest-stay}$     | Time a returned forager stays inside the nest                                            | 60 ticks                      |                                                  |
| $t_{tandemstarter}$ | Time an active recruiter searches for a recruit inside the nest                          | 120 ticks                     |                                                  |
| $t_{feeding}$       | Feeding time of drinking agents                                                          | 120 ticks                     |                                                  |
| $p_{break-up}$      | Probability that tandems break up                                                        | 0/tick                        | 0.002/tick,                                      |



|                          |                                         |     |            |
|--------------------------|-----------------------------------------|-----|------------|
|                          |                                         |     | 0.005/tick |
| $p_{\text{recruitment}}$ | Probability to recruit when “satisfied” | 50% |            |

169

170

### 171 *Process overview*

172 The default simulation duration  $t_{\text{max}}$  was 5400 ticks (corresponding to 90 minutes), but we also  
173 tested a duration of 21600 ticks (corresponding to 6 h). Time and distance in the model were  
174 connected via the walking speeds (0.8 patches/tick outside the nest =  $v_{\text{outside}}$ , 0.4 patches/tick in  
175 a tandem run =  $v_{\text{tandem}}$ ), which were chosen to be similar to the walking velocity (in cm/sec) of  
176 *T. nylander* ants (Glaser and Grüter 2018).

177 When the model was initialized ( $t=0$ ), the nest and either 2 or 10 food sources and the  
178 agents were created. In the situation without tandem running, only scouts were simulated. All  
179 agents started in the centre of the nest. Scouts immediately started to perform a random walk to  
180 search for food sources with the speed of  $v_{\text{outside}}$ , whereas recruits patrolled inside the nest with  
181 speed  $v_{\text{nest}}$  (0.1 patches/tick) and waited to be recruited by another agent. All agents started with  
182 an energy of zero. When leaving the nest, this energy decreases every tick by a metabolic cost  
183  $M_{\text{cost}}$  (see Table 1).  $M_{\text{cost}}$  was chosen so that the metabolic costs that accumulate during an  
184 average foraging trip correspond to ~0.1% of the value of energy obtained during a typical  
185 foraging trip (Fewell 1988). We estimated this by running several simulations and measuring  
186 foraging trip duration of our agents. We also ran simulations with metabolic rates that were 10-  
187 times higher or 10-times lower than our default value but found that this did not affect the  
188 general patterns (Fig. S1).

189 When an agent finds a food source, it becomes a feeding agent and feeds for a duration  
190 of 120 ticks. It gains either 0.75 J or 0.075 J, depending on whether the food source is of high  
191 or low quality. If scouts do not find a food source within a certain time period ( $t_{\text{scouts}}$ ), they  
192 return to the nest. If they are at greater distances from the nest, unsuccessful scouts return

193 quicker (600 ticks). Unsuccessful scouts that are closer to the nest (35 patches from the center)  
194 return if 900 ticks have passed. This was done to match observations that *T. nylanderi* scouts  
195 often return to their nest if they had been searching unsuccessfully for several minutes (S.M.G.,  
196 personal observation). After their return, unsuccessful scouts wait idle inside the nest for 60  
197 ticks ( $t_{\text{nest-stay}}$ ), before resuming to scout. At the end of the feeding time, agents return to the nest  
198 either as “satisfied” or “unsatisfied” foragers. Foragers that found a high-quality food source  
199 were always satisfied, whereas agents feeding at a low-quality food source had only a 10%  
200 probability to become satisfied. After unloading for the duration of  $t_{\text{nest-stay}}$ , “satisfied” agents  
201 become prospective tandem leaders with a 50% probability ( $p_{\text{recruitment}}$ ), whereas unsatisfied  
202 agents would not recruit. This leads to a recruitment probability of 5-50% per trip, which is  
203 similar to what has been found in both *T. nylanderi* and *Pachycondyla harpax* (Glaser and  
204 Grüter 2018; Grüter et al. 2018). Satisfied agents return to the same food source they had visited  
205 before, either in a tandem run or alone. In other words, they use “route memory” to revisit a  
206 high-quality food source, but were unlikely to return to a low-quality food source (10%  
207 probability). Unsatisfied agents would not recruit and either wait inside the nest for a tandem  
208 leader (recruits) or they search for a new food source (scouts). Fig. S2 is a screenshot of a  
209 simulation showing the arrangement of the nest, food sources and some of the agent states.

210 Prospective tandem leaders stay inside the nest and search for a potential recruit for the  
211 duration of 120 ticks ( $t_{\text{tandemstarter}}$ ). A tandem run starts when a leader encounters a recruit on the  
212 same patch. By default, tandem runs do not break up but we also tested situations with a break-  
213 up probability of 0.002 and 0.005 per tick, which corresponds to tandem success rates of ~75 %  
214 and ~50% for the default distance (calculated based on an average tandem run duration of 127  
215 ticks for the default food source distance). Lost tandem followers first perform a random walk  
216 for 180 ticks ( $t_{\text{search-time}}$ ) and – if they do not find a food source – have an equal probability to  
217 become either a scout or to return to the nest as an unsatisfied forager.

218 In the default settings, food sources were *ad libitum*, *i.e.* they did not disappear during  
219 the simulations. Since this may not always be the case, we also simulated food sources that  
220 disappeared after they were visited by 10 agents to create a more dynamic foraging environment.  
221 If a food source disappears before ants return to it (either alone or in a tandem), agents reaching  
222 the old food source location search randomly for 180 ticks ( $t_{\text{search-time}}$ ), then they become  
223 unsatisfied foragers and return to the nest. If the food source vanishes during feeding, the agent  
224 becomes an unsatisfied forager. Food sources that have disappeared are replaced by an identical  
225 food source at the same position after 600 ticks have passed, which means that it has to be  
226 discovered again by scouts. For each simulation run, new inexperienced agents were created as  
227 described above.

228

#### 229 *Tested factors*

- 230 • Spatio-temporal distribution and variability of food sources: we tested the effects of food  
231 source number (2 or 10), variability (only high-quality or variable quality. In the latter  
232 situation, food sources alternated in quality, *i.e.* FS 1 high-quality, FS2 low-quality, FS3,  
233 high-quality etc.), distance, foraging (simulation) duration and food source longevity (stable  
234 or short-lived).
- 235 • Scout-recruit ratio: next to our default ratio of 1:4, we tested several other ratios, including  
236 the extreme case with only scouts.
- 237 • Colony size: in addition to simulating a colony size of 100 agents, we tested a range of other  
238 colony sizes (Table 1).
- 239 • Food discovery time of scouts and recruits: For each simulation run, we quantified the time  
240 scouts needed to discover their first food source. In recruits, we measured both their waiting  
241 time inside the nest and the duration of the tandem run. These durations were averaged per  
242 forager type and per simulation run. Agents that did not discover a food source during an

243 entire simulation were given the maximum value of 5400 ticks. Only conditions with  
244 successful tandem runs were considered.

245

246 The total nest energy NE (total J of all individual collection trips minus the total J of the  
247 metabolic costs) were measured for each simulation run.

248

#### 249 *Sensitivity of outcomes*

250 Due to the stochasticity of simulations we performed 30 simulation runs for each tested  
251 combination of parameters. To assess how sensitive our model is to changes in the default  
252 parameters, we varied many of them and explored their effect, as mentioned above (see Table  
253 1). We also simulated environments with only low-quality food sources. A pure scouting  
254 strategy was always better under these circumstances (Fig. S3). This is because tandem runs  
255 are very rare when all food sources are of low quality and recruits spend most of their time  
256 inside the nest.

257

#### 258 *Statistical analyses*

259 All statistical analyses were performed using the software R 3.6.3 ([www.r-project.org](http://www.r-project.org)). Since  
260 different treatments occasionally had unequal variance (heteroscedasticity) or contained zeros  
261 and in order to provide a consistent statistical approach we used non-parametric statistical tests  
262 throughout. It should be noted, however, that when we compared parametric and non-  
263 parametric methods (Anova's), they yielded very similar results. We used Mann-Whitney U  
264 tests to compare two independent samples and Wilcoxon signed-rank tests for paired data. In  
265 addition to the p-values, the R software provides the test statistic value W, which is a linear  
266 transformation of the usual rank sum statistic U. When three groups were compared, we used

267 Kruskal-Wallis tests and Dunn tests with sequential Bonferroni corrections for post-hoc pair-  
268 wise comparisons (“FSA” package, Ogle et al. 2020) (Sokal and Rohlf 1995).

269

## 270 **Results**

### 271 *Distribution of food sources*

272 We first tested if the number of food sources and their distance from the nest affect the value  
273 of communication. When colonies had access to few food sources, they were more successful  
274 with tandem recruitment (scout-recruit ratio of 1:4) than colonies consisting only of scouts,  
275 irrespective of whether food sources were of high-quality (Fig. 2) (Mann-Whitney U Test,  $W$   
276 = 215,  $p = 0.0004$ ) or of variable quality ( $W = 307$ ,  $p = 0.034$ ). In a rich environment, with 10  
277 food sources, colonies collected overall more energy (Fig. 2). Tandem communication was  
278 beneficial when food source quality was variable ( $W = 112$ ,  $p < 0.0001$ ), whereas colonies  
279 consisting only of scouts performed better when all 10 food sources were of high quality ( $W =$   
280  $773$ ,  $p < 0.0001$ ). This general pattern did not change when food sources were closer to the nest  
281 (20 patches instead of 40 patches) (2 food sources, high-quality:  $p < 0.0001$ ; variable-quality:  
282  $W = 210$ ,  $p = 0.0003$ ; 10 food sources, high-quality:  $W = 827$ ,  $p < 0.0001$ ; variable-quality:  $W$   
283 = 54,  $p < 0.0001$ ), but colonies gained overall more energy when all food sources were close to  
284 the nest (Fig. 2). Fig. 2e and 2f illustrate the temporal development of nest energy during  
285 exemplary simulation runs that correspond to the conditions shown in Fig. 2a and 2b with high-  
286 quality food sources.

287

288

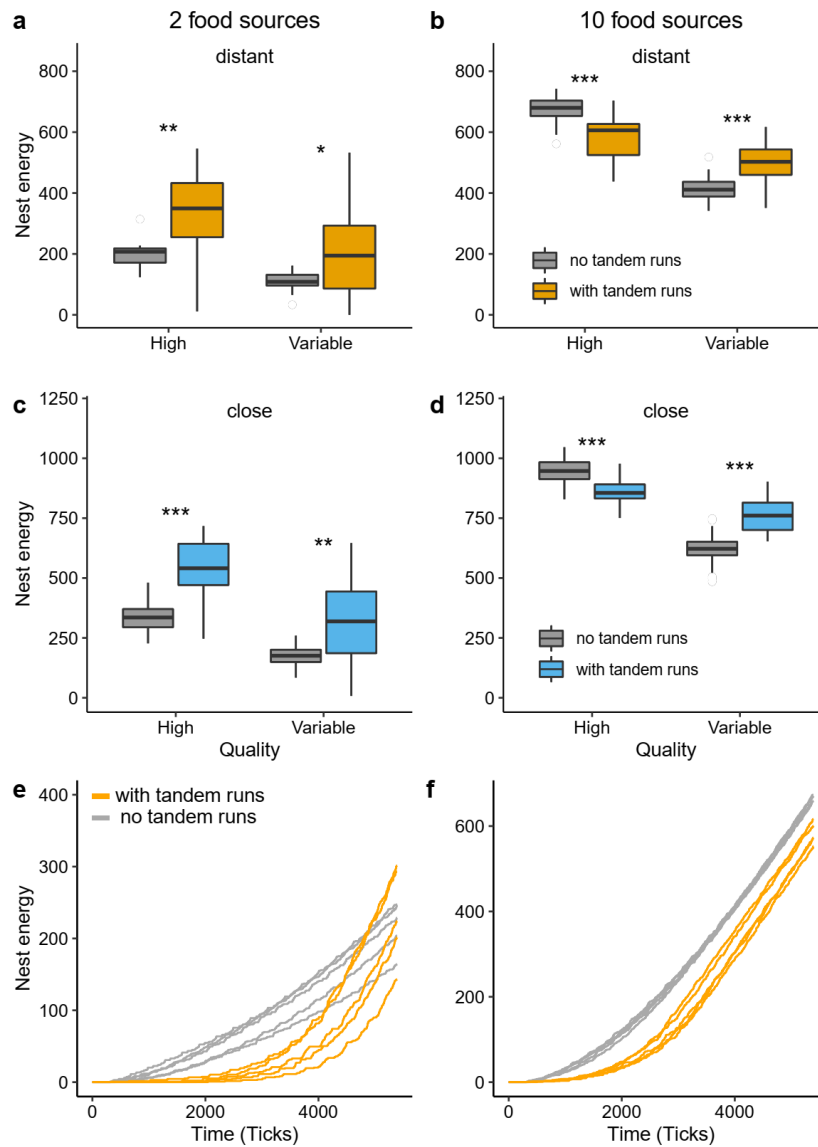

289

290 **Fig. 2.** Nest energy with 2 or 10 food sources. In (a) and (b) food sources were at a distance of 40  
 291 patches, whereas in (c) and (d) food sources were at a distance of 20 patches. \*p<0.05, \*\*p<0.001,  
 292 \*\*\*p<0.0001. In (e) and (f), nest energy is plotted over time for conditions as shown in (a) and (b) when  
 293 all food sources were of high quality (5 simulation runs per treatment for visualisation of the trajectory).  
 294

295

### 296 *Foraging duration and food source longevity*

297 When we increased the foraging duration (*i.e.* the simulation duration) from 5400 to 21600  
 298 ticks, we found a similar pattern. Tandem running was highly beneficial when there were few  
 299 food sources (high-quality:  $W = 0$ ,  $p < 0.0001$ ; variable-quality:  $W = 0$ ,  $p < 0.0001$ ). Tandem  
 300 runs were also beneficial when there were many food sources of variable quality ( $W = 56$ ,  $p <$   
 301  $0.0001$ ). In the case of many high-quality food sources, pure scout colonies performed better

302 (W = 900,  $p < 0.0001$ ). It is noteworthy that colonies with tandem communication were almost  
303 as successful in an environment with 2 food sources as in an environment with 10 food sources  
304 (Fig. 3a,b).  
305

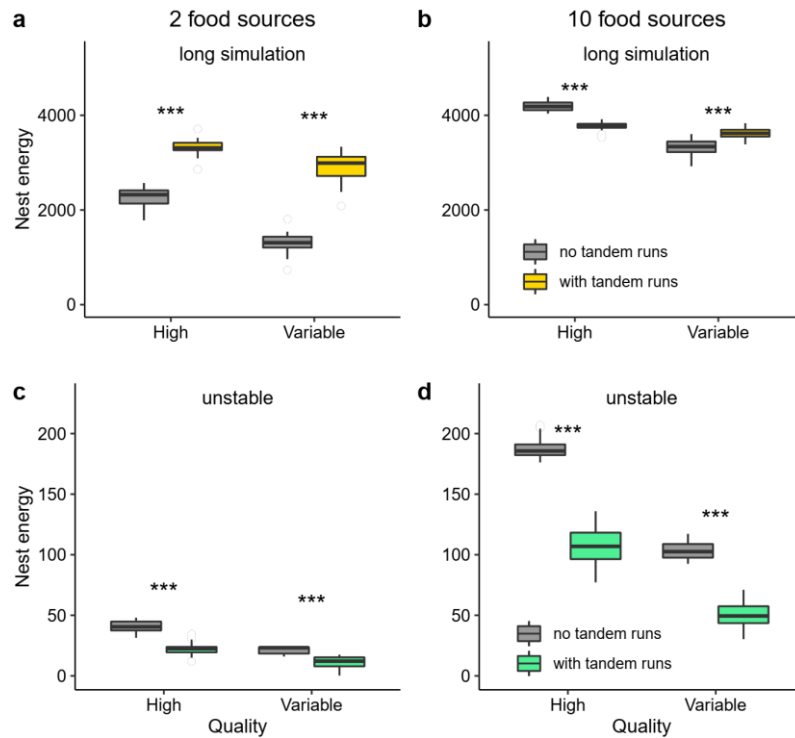

306

307 **Fig. 3.** Nest energy with 2 or 10 food sources. In (a) and (b), food sources simulations were 4-times  
308 longer (21600 ticks instead of 5400). In (c) and (d), simulations lasted 5400 ticks and food sources  
309 disappeared if they were visited by 10 ants. A new food source appeared after a delay.

310 So far, we assumed that food sources offered food during the entire simulation. Next,  
311 we tested the effects of short-lived food sources. If food sources were unstable (sometimes  
312 called non-renewable), a scouting strategy was more successful, irrespective of the number of  
313 food sources and their variability (Fig. 3c,d) (2 food sources, high-quality: W = 897, p-value <  
314 0.0001; variable-quality: W = 896, p-value < 0.0001; 10 food sources, high-quality: W = 900,  
315 p-value < 0.0001; variable-quality: W = 900, p-value < 0.0001). Differences were particularly  
316 pronounced when colonies were offered many food sources. Scouting remained the better  
317 strategy when we increased the foraging duration to 21600 ticks (e.g. 2 food sources, high-  
318 quality: W = 900, p-value < 0.0001; variable-quality: W = 900, p-value < 0.0001).

319

320 *Tandem success rate*

321 Tandems do occasionally break up and we tested how this affects the energy collected by  
322 colonies. We compared colonies with 100% (default), ~75% and ~50% successful tandem runs  
323 and colonies with only scouts in an environment with few food sources, *i.e.* under conditions  
324 where tandem runs are beneficial (Fig. 2a). Our simulations show that a reduction in tandem  
325 success rate has a negative impact on the energy intake that is collected by colonies (Fig. 4). If  
326 only about 50% of the tandem runs are successful, colonies without any tandem running collect  
327 more energy in an environment with few, stable food sources (Fig. 4) (high-quality, 50%  
328 success rate vs. no tandems:  $W = 246$ ,  $p = 0.002$ , variable-quality, 50% success rate vs. no  
329 tandems:  $W = 257$ ,  $p = 0.004$ ).

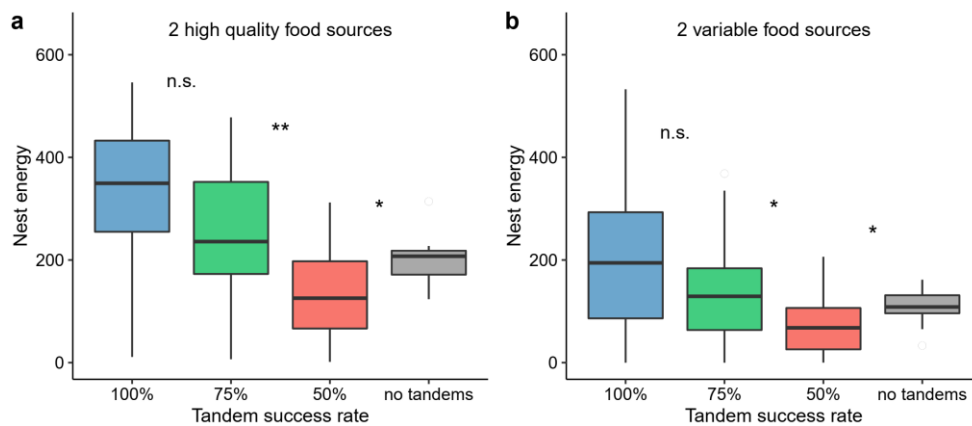

330

331 **Fig. 4.** Nest energy with 2 food sources of high (a) and mixed (b) quality in relation to the tandem success  
332 rate. Adjacent treatment groups were compared, as indicated by asterisks or “n.s.”. No tandems = only  
333 scouts. Default settings were used for the other parameters.

334

335 However, tandem runs with a high rate of failure (50%) are not always a disadvantage  
336 compared to having no communication. When colonies can forage for longer (simulations of  
337 21600 ticks), colonies that perform tandem runs with a ~50% break-up rate are more successful  
338 than colonies consisting of only scouts (Fig. 5) (high-quality, 50% success rate vs. no tandems:  
339  $W = 866$   $p < 0.0001$ , variable-quality, 50% success rate vs. no tandems:  $W = 689$ ,  $p = 0.0003$ ),  
340 highlighting the benefits of imperfect communication over longer time periods.



341

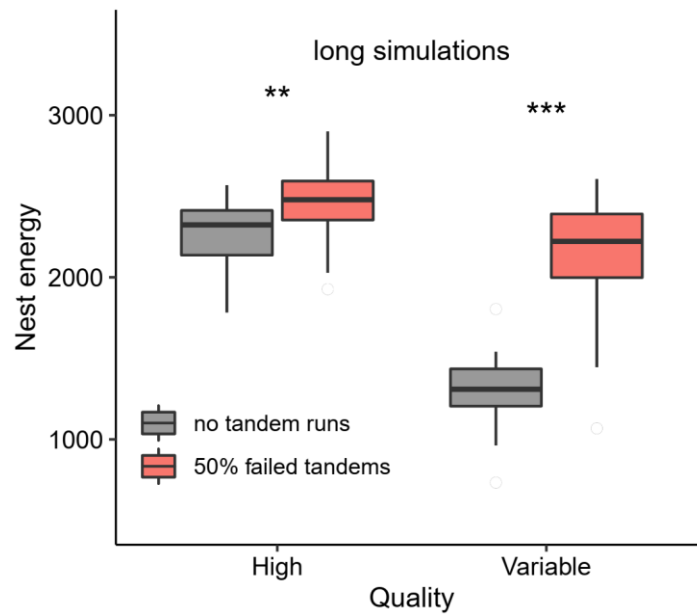

342

343 **Fig. 5.** Nest energy with 2 food sources of high or variable quality and a long foraging duration. Colonies  
 344 were scouting or could recruit with tandem runs that had a ~50% failure rate. Default settings were used  
 345 for the other parameters.

346

347 *Colony size and scout-recruit ratio*

348 We tested various colony sizes ranging from 20 to 200 agents in an environment with few,

349 variable food sources, *i.e.* an environment that favours tandem running under default conditions

350 (see Fig. 2a).

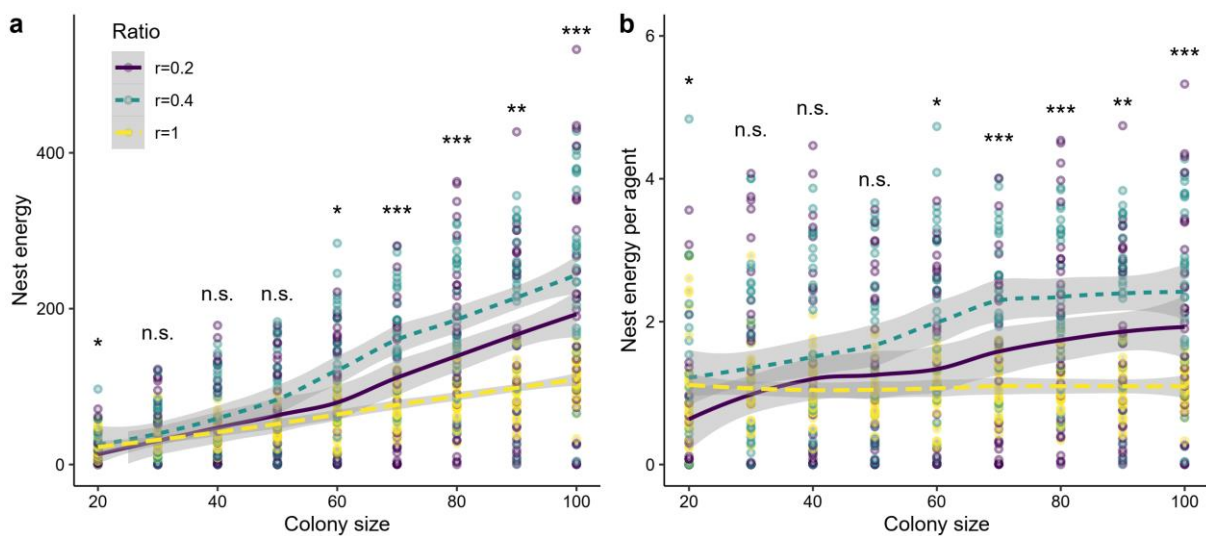

351

352 **Fig. 6.** The relationship between colony size and nest energy (a) and nest energy per agent (b) in  
 353 colonies with and without tandem runs in environments with two food sources of variable quality. Three

354 scout-recruit ratios were simulated,  $r = 0.2$  and  $r = 0.4$  and colonies consisting only of scouts,  $r = 1.0$ .  
 355 Grey area indicates confidence intervals. Significance tests refer to comparisons among ratios,  
 356 separately for each colony size. P-values for total nest energy (a) or energy per agent (b) are identical.  
 357 Default settings were used for the other parameters.

358

359 Colony size had a strong effect on the total collected energy that was collected (Fig. 6).

360 If colonies were very small (20 foragers), they were least successful if they performed tandem

361 runs and had a default scout-recruit ratio of 0.2 (Table 2). There was no difference in foraging

362 success when colony size ranged from 30 to 50 foragers. However, colonies with tandem

363 recruitment were more successful if they had at least 60 agents (Table 2). The most successful

364 colonies contained 40% scouts, suggesting that the scout-recruit ratio has a considerable impact

365 on colony success. Fig. 6b shows the nest energy collected per agent (nest energy/colony size).

366 In colonies with only scouts, individual agents collected a relatively constant amount of energy

367 irrespective of colony size (Spearman rank correlation:  $\rho = 0.1$ ,  $p = 0.09$ ). In colonies with

368 tandem running, on the other hand, individual agents collected more energy on average as

369 colony size increased from 20 to 100 agents ( $r = 0.2$ ,  $\rho = 0.34$ ,  $p < 0.0001$ ;  $r = 0.4$ ,  $\rho = 0.35$ ,

370  $p < 0.0001$ ).

371

372 **Table 2:** Effect of colony size on nest energy. Three conditions were tested: in two conditions, colonies  
 373 performed tandem runs and had a scout-recruit ratio of 0.2 or 0.4. In the third condition, colonies  
 374 consisted only of scouts (1.0). Pair-wise comparisons were performed if the overall  $p < 0.05$  and p-  
 375 values were corrected using sequential Bonferroni.

376

| Colony size | Kruskal-Wallis Test |         | p-value of pair-wise comparisons |             |             |
|-------------|---------------------|---------|----------------------------------|-------------|-------------|
|             | $\chi^2$            | p-value | 0.2 vs. 0.4                      | 0.2 vs. 1.0 | 0.4 vs. 1.0 |
| 20          | 12.7                | 0.002   | 0.018                            | 0.002       | 0.42        |
| 30          | 2.33                | 0.31    | NA                               | NA          | NA          |
| 40          | 3.92                | 0.14    | NA                               | NA          | NA          |
| 50          | 1.81                | 0.41    | NA                               | NA          | NA          |
| 60          | 8.98                | 0.01    | 0.077                            | 0.4         | 0.01        |
| 70          | 22.85               | <0.0001 | 0.0007                           | 0.35        | <0.0001     |
| 80          | 20.6                | <0.0001 | 0.13                             | 0.007       | <0.0001     |
| 90          | 15.86               | 0.0004  | 0.09                             | 0.048       | 0.0002      |
| 100         | 19.17               | <0.0001 | 0.053                            | 0.027       | <0.0001     |
| 200         | 46.59               | <0.0001 | 0.006                            | 0.0001      | <0.0001     |

377

378 To explore this further, we simulated different scout-recruit ratios and different colony  
379 sizes to test how the balance between scouts and recruits affects colony foraging success.  
380 Simulations suggest that the optimal proportion of scouts is ~40% for the simulated  
381 environment, irrespective of colony size (Fig. 7). Interestingly, deviations from the optimal  
382 ratio have a larger negative impact in larger colonies (see “pointiness” of curves in Fig. 7). For  
383 example, there is no difference in success when colonies with 50 agents contain 40% or 80%  
384 of scouts ( $W = 119$ ;  $p = 0.54$ ). When colony size is 200, however, colonies with 80% scouts  
385 collect 31.5% less energy than colonies with 40% scouts ( $W = 199$ ,  $p = 0.0001$ ).  
386

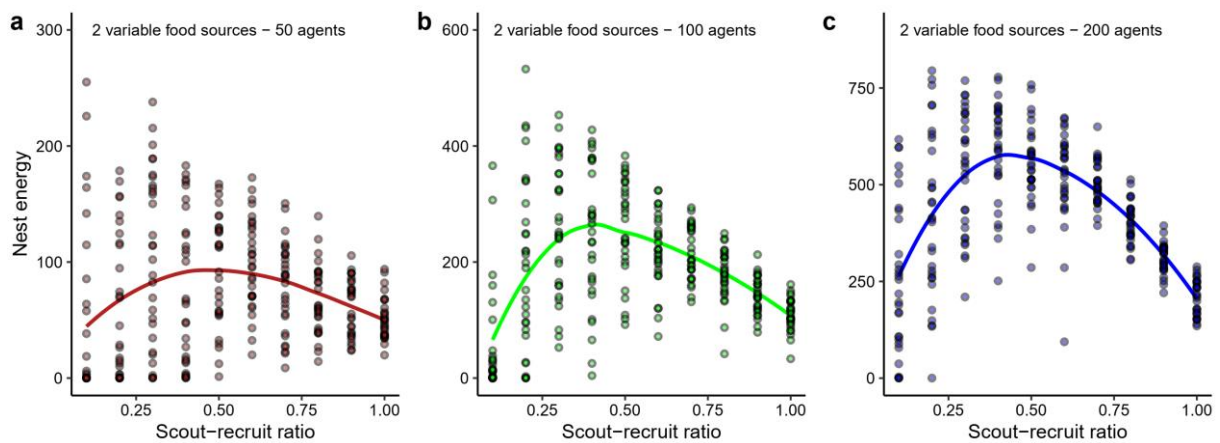

387  
388 **Fig. 7.** The effect of the scout-recruit ratio with three different colony sizes. The line shows the best fit  
389 line based on local polynomial regression using the LOESS method (locally estimated scatterplot  
390 smoothing). The smallest ratio was 0.1. A ratio of 1.0 refers to colonies containing only scouts.  
391  
392

### 393 *Discovery times*

394 Unsurprisingly, foragers needed more time to find their first food source in an environment  
395 with few food sources compared to when there were many food sources (Fig. 8). Recruits  
396 needed less time in an environment with few, high-quality food sources compared to scouts  
397 (Wilcoxon-signed rank test:  $W = 143$ ,  $p$ -value  $< 0.0001$ ), whereas there was no difference when  
398 food sources were variable in quality (Fig. 8a) ( $W = 348$ ,  $p$ -value = 0.13). However, in an  
399 environment with many food sources, scouts did comparatively better and needed a similar

400 amount of time to locate their first food source when food sources were all high-quality ( $W =$   
401 327,  $p$ -value = 0.07). With many, variable food sources, scouts were significantly faster than  
402 recruits (Fig. 8b) ( $W = 720$ ,  $p$ -value < 0.0001).

403

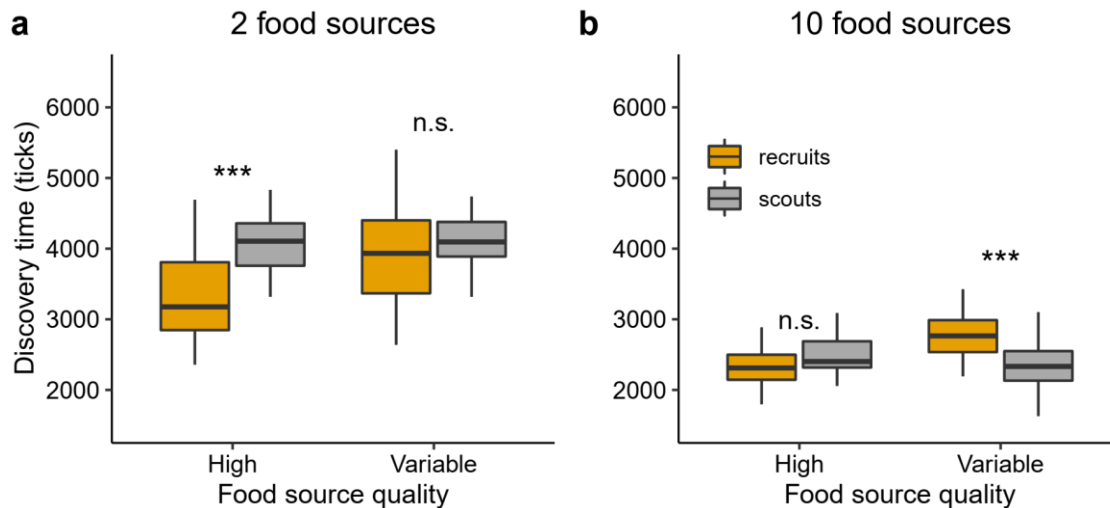

404

405 **Fig. 8.** Time until agents located their first food source in environments with few (a) or many (b) food  
406 sources of constant or variable quality. For recruits, the food discovery time consisted of the time waiting  
407 inside the nest and the tandem run duration. Default settings were used for the other parameters.

408

409

## 410 Discussion

411 Our simulations show that the spatio-temporal distribution of food sources greatly affects  
412 whether colonies with communication are more successful than colonies that employ a scouting  
413 strategy. Tandem running was beneficial when colonies were in an environment with few food  
414 sources (+ 57-83% nest energy) and when food sources were of variable quality (Fig. 2a,b).  
415 Colonies without communication were more successful (~15%) in a rich environment that  
416 offered only high-quality food sources. This is in line with studies that simulated honeybee  
417 foraging and found that communicating food source locations by waggle dancing is most  
418 beneficial if food sources are hard to find and of variable quality (Dornhaus et al. 2006;  
419 Beekman and Lew 2008; Schürch and Grüter 2014; I'Anson Price et al. 2019). Under such

420 circumstances, the probability that scouts find high-quality food sources on their own is low  
421 and communicating the location of a relatively small number of high-quality patches becomes  
422 advantageous. As food source variability decreases and the number of high-quality food sources  
423 increases, scouts become more successful. Even though colonies with communication also  
424 collect more energy in such an environment, the benefits of communication no longer offset the  
425 costs of recruits waiting for information inside the nest. This highlights that communication  
426 often has considerable time and opportunity costs (Seeley 1983; Seeley and Visscher 1988;  
427 Dechaume-Moncharmont et al. 2005; Schürch and Grüter 2014; I'Anson Price et al. 2019).

428         It has been hypothesised that recruitment communication is particularly beneficial in an  
429 ephemeral environment (Sherman and Visscher 2002; Dornhaus and Chittka 2004; Grüter and  
430 Ratnieks 2011), *i.e.* when food sources last only for short time-periods and, thus, need to be  
431 exploited quickly. Counterintuitively, a simulation model of honeybee foraging has found that  
432 communication was less beneficial if food sources were shorter-lived (Schürch and Grüter  
433 2014). Our simulations support their findings by showing that tandem running was a very  
434 successful strategy in a stable environment with relatively long foraging durations (*i.e.* with  
435 longer simulations) and few, variable food sources (Fig. 3a). A long-lasting food source could  
436 be a large insect (Lanan 2014), floral nectars or a group of honeydew secreting insects (Carroll  
437 and Janzen 1973; Quinet and Pasteels 1996; Völkl et al. 1999; Mailleux et al. 2003; Lanan  
438 2014). A very different pattern was observed when resources were shorter-lived: colonies  
439 without communication were always more successful, irrespective of the foraging (simulation)  
440 duration (Fig. 3c,d). The most likely explanation is that colonies with communication pay time  
441 costs without being able to take advantage of the benefits of communication over longer time  
442 periods (see also Schürch and Grüter 2014). Our model differs from theirs in that our food  
443 sources only disappeared if they were exploited, rather than with a constant probability. A food  
444 source that disappears after it has been exploited could be a droplet of honeydew that fell on

445 vegetation. Honeydew droplets on leaf surfaces represent an important food source for the  
446 tandem recruiting *Temnothorax curvispinosus* (Lynch et al. 1988).

447 Tandem runs occasionally break-up and success rates of ~50% to 90% are not  
448 uncommon (Wilson 1959; Pratt 2008; Kaur et al. 2017; Glaser and Grüter 2018; Grüter et al.  
449 2018). We simulated different success rates and found that colonies with more successful  
450 tandem runs collected more energy (Fig 4). If the success rate was about 50%, colonies  
451 consisting only of scouts collected more energy in an environment with few food sources, *i.e.*  
452 a virtual environment that normally favours tandem running. When foraging durations were  
453 longer, on the other hand, colonies with tandem runs gained the upper hand over scouting  
454 colonies even though half of all tandem runs failed (Fig. 5). Under these circumstances, even a  
455 relatively low number of successful recruitment events can be very important because the  
456 discovered high-quality food sources can be exploited for longer time periods by successful  
457 recruits. Additionally, tandem recruitment can lead to an exponential increase of ants at a feeder  
458 even if a leader recruits  $<1$  follower per trip. With exponential growth, the impact of  
459 communication will increase over time (Fig. 2e).

460 We found that colony size had a considerable effect on the value of tandem  
461 communication (Fig. 6). This contrasts with models of honeybee communication, where colony  
462 size did not greatly affect the benefits of communication (Dornhaus et al. 2006; Schürch and  
463 Grüter 2014), but is consistent with an empirical study on honeybee colony foraging success  
464 (Donaldson-Matasci et al. 2013) and a mathematical model of ant communication (Planqué et  
465 al. 2010). If colonies contained 60 or more foragers, tandem communication was usually  
466 beneficial. However, a pure scouting strategy was equally or more successful when colonies  
467 had 20 to 50 foragers, even in environments with few and variable food sources, *i.e.* a virtual  
468 environment that normally favours tandem running. This number of foragers could be expected  
469 in ant colonies with ~80-250 workers (assuming that foragers make up 20-30% of the worker

470 population, e.g. Shaffer et al. 2013), which is also the typical colony size of many ant species  
471 that use tandem running and species with solitary foraging (Beckers et al. 1989). Our simulation  
472 results could explain why some species, e.g. in the genera *Diacamma* or *Neoponera*, do not  
473 perform tandem runs during foraging even though they use this recruitment method during  
474 migrations (Hölldobler 1984; Traniello and Hölldobler 1984; Maschwitz et al. 1986). Whether  
475 colonies employ tandem running might depend on the food sources they collect (e.g. small or  
476 large items) and whether they are risk-averse or risk-prone because tandem recruitment was  
477 often associated with a more unpredictable outcome in our simulations (greater variation in nest  
478 energy gain among simulations of a particular situation, see Fig. 2). A better understanding of  
479 the natural history of these species and similar species that do perform tandem runs (e.g.  
480 *Neoponera* vs. *Pachycondyla*) is needed to understand why some species use communication,  
481 while others forage solitarily.

482 Colony foraging performance depended on the proportions of scouts and recruits (Fig.  
483 7). In our simulations with few food sources, colonies were most successful if scouts  
484 represented about 40% of the forager population, but this is likely to depend on the number and  
485 variability of food sources (see Fig. 2). Interestingly, having the right scout-recruit ratio is more  
486 important in larger colonies than in smaller ones, possibly because the foraging success of  
487 smaller colonies depends more on chance events, such as the discovery of a high-quality food  
488 source by a single scout. This suggests that larger colonies would benefit from having the ability  
489 to assess their current environment and adjust their use of communication accordingly. Whether  
490 this is indeed common is not well known, but it has recently been reported that honeybees are  
491 able to assess the value of communication and reduce their reliance on waggle dances if dance  
492 information is not beneficial in the current environment (I'Anson Price et al. 2019).

493 In the simulations, we measured the time recruits and scouts need to locate their first  
494 food source in environments with many or few food sources. We found that the food discovery



495 time depends strongly on the environment. Recruits were faster in environments with few high-  
496 quality food sources, whereas scouts found a food source sooner in an environment with many,  
497 variable food sources. Our measurements also included the time that recruits wait inside the  
498 nest to find a tandem leader. Franks and Richardson (2006) found that tandem followers found  
499 a food source faster in their experiment with one food source, which, in combination with their  
500 other findings, indicated that tandem running fulfils the criteria for animal teaching set out by  
501 Caro and Hauser (1992; namely, a teacher [*i*] modifies its behaviour in the presence of a naive  
502 observer, [*ii*] at some cost to the leader [*iii*] so that the observer can learn more quickly or  
503 efficiently). Our simulations suggest that this is the case only in certain environments, namely  
504 those with few, high-quality resources. In other situations, scouts are likely to learn food source  
505 locations quicker and tandem running might no longer fulfil the criteria for animal teaching  
506 (namely that a follower acquires knowledge or learns a skill more rapidly or efficiently than it  
507 might otherwise do, or that it would not learn at all, see Caro and Hauser 1992).

508         Taken together, our simulations show that the value of tandem communication is highly  
509 dependent on the environment and the size and composition of the colony. Future studies should  
510 explore whether and how foragers can assess their foraging environment and modify their  
511 communication behaviour (see also Grüter and Czaczkcs 2019). It would also be desirable to  
512 test the conclusions from our simulations empirically, but so far it has been challenging to stop  
513 ants from performing tandem runs without affecting their behaviour.

514

## 515 **Acknowledgments**

516 We would like to thank the AG Foitzik for discussion and feedback on the model. S.M.G. was  
517 funded by the German Research Foundation (DFG: GR 4986/1-1).

518



519 **References**

- 520 Al Toufailya HM, Grüter C, Ratnieks FLW (2013) Persistence to unrewarding feeding locations by  
521 honeybee foragers (*Apis mellifera*): the effects of experience, resource profitability and season.  
522 *Ethology* 119:1096–1106
- 523 Beckers R, Goss S, Deneubourg J-L, Pasteels JM (1989) Colony size, communication and ant foraging  
524 strategy. *Psyche* 96:239–256
- 525 Beekman M, Lew JB (2008) Foraging in honeybees - when does it pay to dance? *Behavioral Ecology*  
526 19:255–262
- 527 Caro TM, Hauser MD (1992) Is there teaching in nonhuman animals? *Quarterly Review of Biology*  
528 67:151–174
- 529 Carroll CR, Janzen DH (1973) Ecology of foraging by ants. *Annual Review of Ecology and*  
530 *Systematics* 4:231–257
- 531 Collett M, Chittka L, Collett TS (2013) Spatial memory in insect navigation. *Current Biology*  
532 23:R789–R800
- 533 Czaczkes TJ, Czaczkes B, Iglhaut C, Heinze J (2015a) Composite collective decision-making.  
534 *Proceedings of the Royal Society of London B: Biological Sciences* 282:20142723
- 535 Czaczkes TJ, Grüter C, Ratnieks FLW (2015b) Trail pheromones: an integrative view of their role in  
536 colony organization. *Annual Review of Entomology* 60:581–599
- 537 Dechaume-Moncharmont FX, Dornhaus A, Houston AI, McNamara JM, Collins EJ, Franks NR  
538 (2005) The hidden cost of information in collective foraging. *Proceedings of the Royal Society*  
539 *of London Series B-Biological Sciences* 272:1689–1695
- 540 Donaldson-Matasci MC, Dornhaus A (2012) How habitat affects the benefits of communication in  
541 collectively foraging honey bees. *Behavioral Ecology and Sociobiology* 66:583–592
- 542 Donaldson-Matasci MC, DeGrandi-Hoffman G, Dornhaus A (2013) Bigger is better: honeybee  
543 colonies as distributed information-gathering systems. *Animal Behaviour* 85:585–592
- 544 Dornhaus A, Chittka L (2004) Why do honey bees dance? *Behavioral Ecology and Sociobiology*  
545 55:395–401
- 546 Dornhaus A, Klügl F, Oechslein C, Puppe F, Chittka L (2006) Benefits of recruitment in honey bees:  
547 effects of ecology and colony size in an individual-based model. *Behavioral Ecology* 17:336–  
548 344
- 549 Dornhaus A, Powell S, Bengston S (2012) Group size and its effects on collective organization.  
550 *Annual Review of Entomology* 57:123–141
- 551 Franklin EL (2014) The journey of tandem running: the twists, turns and what we have learned.  
552 *Insectes Sociaux* 61:1–8
- 553 Franks NR, Richardson T (2006) Teaching in tandem-running ants. *Nature* 439:153
- 554 Fresneau D (1985) Individual foraging and path fidelity in a ponerine ant. *Insectes Sociaux* 32:109–  
555 116

- 556 Galef BG, Giraldeau LA (2001) Social influences on foraging in vertebrates: causal mechanisms and  
557 adaptive functions. *Animal Behaviour* 61:3–15
- 558 Glaser S, Grüter C (2018) Ants (*Temnothorax nylanderi*) adjust tandem running when food source  
559 distance exposes them to greater risks. *Behavioral Ecology and Sociobiology* 72:40
- 560 Grüter C, Czaczkes TJ (2019) Communication in social insects and how it is shaped by individual  
561 experience. *Animal Behaviour* 151:207-215
- 562 Grüter C, Ratnieks FLW (2011) Honeybee foragers increase the use of waggle dance information  
563 when private information becomes unrewarding. *Animal Behaviour* 81:949–954
- 564 Grüter C, Wüst M, Cipriano AP, Nascimento FS (2018) Tandem recruitment and foraging in the  
565 ponerine ant *Pachycondyla harpax* (Fabricius). *Neotropical Entomology* 47:742-749
- 566 Heinze J, Foitzik S, Hippert A, Hölldobler B (1996) Apparent Dear-enemy Phenomenon and  
567 Environment-based Recognition Cues in the Ant *Leptothorax nylanderi*. *Ethology* 102:510–  
568 522
- 569 Hingston RWG (1929) *Instinct and intelligence*. Macmillan, New York
- 570 Hölldobler B (1984) Communication during foraging and nest-relocation in the African stink ant,  
571 *Paltothyreus tarsatus* Fabr. (Hymenoptera, Formicidae, Ponerinae). *Zeitschrift für*  
572 *Tierpsychologie* 65:40–52
- 573 Hölldobler B, Wilson EO (1990) *The Ants*. The Belknap Press of Harvard University, Cambridge,  
574 Massachusetts
- 575 Hoppitt W, Laland KN (2013) *Social learning: An Introduction to Mechanisms, Methods, and Models*.  
576 Princeton University Press, Princeton
- 577 I'Anson Price R, Dulex N, Vial N, Vincent C, Grüter C (2019) Honeybees forage more successfully  
578 without the “dance language” in challenging environments. *Science Advances* 5:eaat0450
- 579 I'Anson Price R, Grüter C (2015) Why, when and where did honey bee dance communication evolve?  
580 *Frontiers in Ecology and Evolution* 3:1–7
- 581 Jarau S, Hrncir M (2009) *Food Exploitation by Social Insects: Ecological, Behavioral, and Theoretical*  
582 *Approaches*. CRC Press, Taylor & Francis Group, Boca Raton, Florida
- 583 Kaur R, Joseph J, Anoop K, Sumana A (2017) Characterization of recruitment through tandem  
584 running in an Indian queenless ant *Diacamma indicum*. *Royal Society Open Science* 4:160476
- 585 Lanan M (2014) Spatiotemporal resource distribution and foraging strategies of ants (Hymenoptera:  
586 Formicidae). *Myrmecological News* 20:53
- 587 Mailleux AC, Deneubourg J-L, Detrain C (2003) Regulation of ants' foraging to resource productivity.  
588 *Proceedings of the Royal Society of London Series B-Biological Sciences* 270:1609–1616
- 589 Maschwitz U, Jessen K, Knecht S (1986) Tandem Recruitment and Trail Laying in the Ponerine Ant  
590 *Diacamma rugosum*: Signal Analysis. *Ethology* 71:30–41
- 591 Möglich M, Maschwitz U, Hölldobler B (1974) Tandem calling: a new kind of signal in ant  
592 communication. *Science* 186:1046–1047
- 593 Ogle DH, Wheeler P, Dinno A (2020) *FSA: Fisheries Stock Analysis*

- 594 Planqué R, van den Berg JB, Franks NR (2010) Recruitment strategies and colony size in ants. PLoS  
595 ONE 5:e11664
- 596 Pratt SC (2008) Efficiency and regulation of recruitment during colony emigration by the ant  
597 *Temnothorax curvispinosus*. Behavioral Ecology and Sociobiology 62:1369-1376
- 598 Quinet Y, Pasteels JM (1996) Spatial specialization of the foragers and foraging strategy in *Lasius*  
599 *fuliginosus* (Latreille) (Hymenoptera, Formicidae). Insectes Sociaux 43:333-346
- 600 Reeves DD, Moreau CS (2019) The evolution of foraging behavior in ants (Hymenoptera:  
601 Formicidae). 14
- 602 Richardson TO, Sleeman PA, McNamara JM, Houston AI, Franks NR (2007) Teaching with  
603 evaluation in ants. Current Biology 17:1520-1526
- 604 Rieucou G, Giraldeau LA (2011) Exploring the costs and benefits of social information use: an  
605 appraisal of current experimental evidence. Philosophical Transactions of the Royal Society of  
606 London Series B-Biological Sciences 366:949-957
- 607 Schürch R, Grüter C (2014) Dancing bees improve colony foraging success as long-term benefits  
608 outweigh short-term costs. PLoS ONE 9:e104660
- 609 Seeley TD (1995) The wisdom of the hive: The social physiology of honey bee colonies. Harvard  
610 University Press, Cambridge, Massachusetts
- 611 Seeley TD (1983) Division of labor between scouts and recruits in honeybee foraging. Behavioral  
612 Ecology and Sociobiology 12:253-259
- 613 Seeley TD, Visscher PK (1988) Assessing the benefits of cooperation in honeybee foraging: search  
614 costs, forage quality, and competitive ability. Behavioral Ecology and Sociobiology 22:229-  
615 237
- 616 Sherman G, Visscher PK (2002) Honeybee colonies achieve fitness through dancing. Nature 419:920-  
617 922
- 618 Sokal RR, Rohlf FJ (1995) Biometry, Third edition. W. H. Freeman and company, New York
- 619 Sumpter DJT, Pratt SC (2003) A modelling framework for understanding social insect foraging.  
620 Behavioral Ecology and Sociobiology 53:131-144
- 621 Sumpter DJT (2010) Collective Animal Behavior. Princeton University Press, Princeton
- 622 Traniello JF, Hölldobler B (1984) Chemical communication during tandem running in *Pachycondyla*  
623 *obscuricornis* (Hymenoptera: Formicidae). Journal of Chemical Ecology 10:783-794
- 624 Völkl W, Woodring J, Fischer M, Lorenz MW, Hoffmann KH (1999) Ant-aphid mutualisms: the  
625 impact of honeydew production and honeydew sugar composition on ant preferences.  
626 Oecologia 118:483-491
- 627 von Frisch K (1967) The dance language and orientation of bees. Harvard University Press,  
628 Cambridge, Massachusetts
- 629 Wilson EO (1959) Communication by tandem running in the ant genus *Cardiocondyla*. Psyche 66:29-  
630 34

631 **Fig. S1**

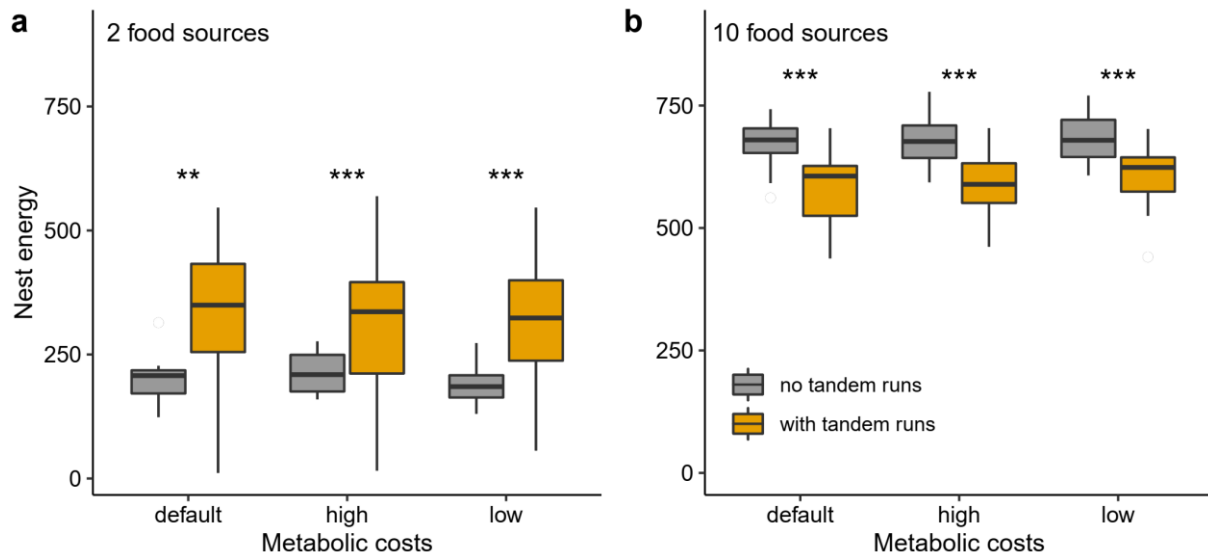

632

633 **Fig. S1.** The effects of 10-times higher and 10-times lower metabolic costs on nest energy  
634 (see Table 1). Two (a) and ten (b) high-quality food sources were offered, default values were  
635 used for all other parameters. The default conditions match those shown in Fig. 2a and 2b.  
636 Mann-Whitney U tests, \*\* $p < 0.001$ , \*\*\* $p < 0.0001$ .

637

638

639

640

641

642

643

644

645

646

647 **Fig. S2**

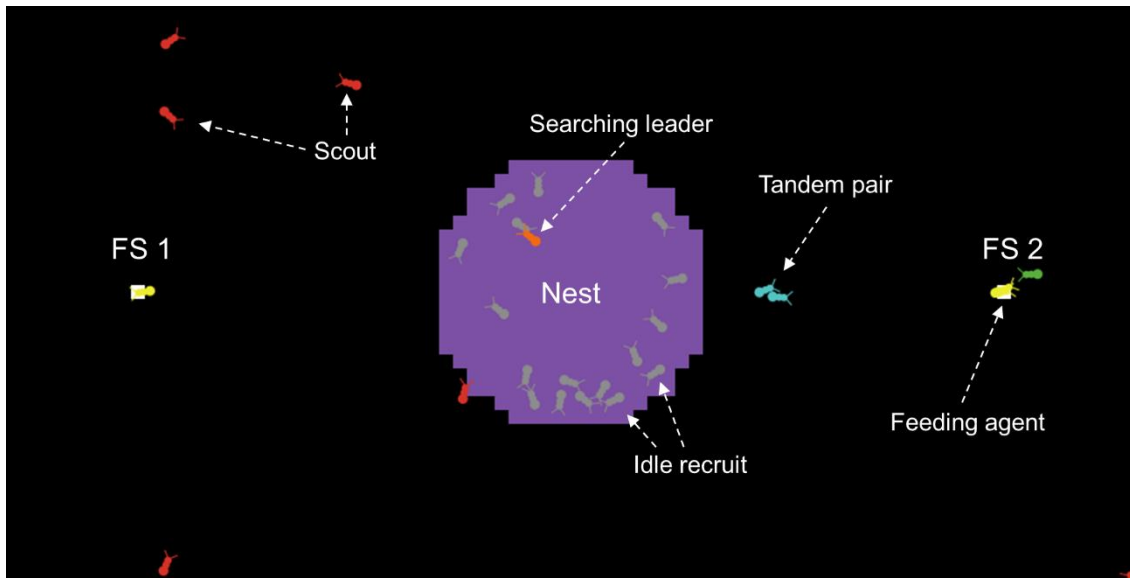

648

649 **Fig. S2.** NetLogo interface showing some of the different agent types in different colours. In  
650 this situation, two food sources (FS 1 and FS 2) were offered.

651

652

653

654

655

656

657

658

659

660

661

662 **Fig. S3**

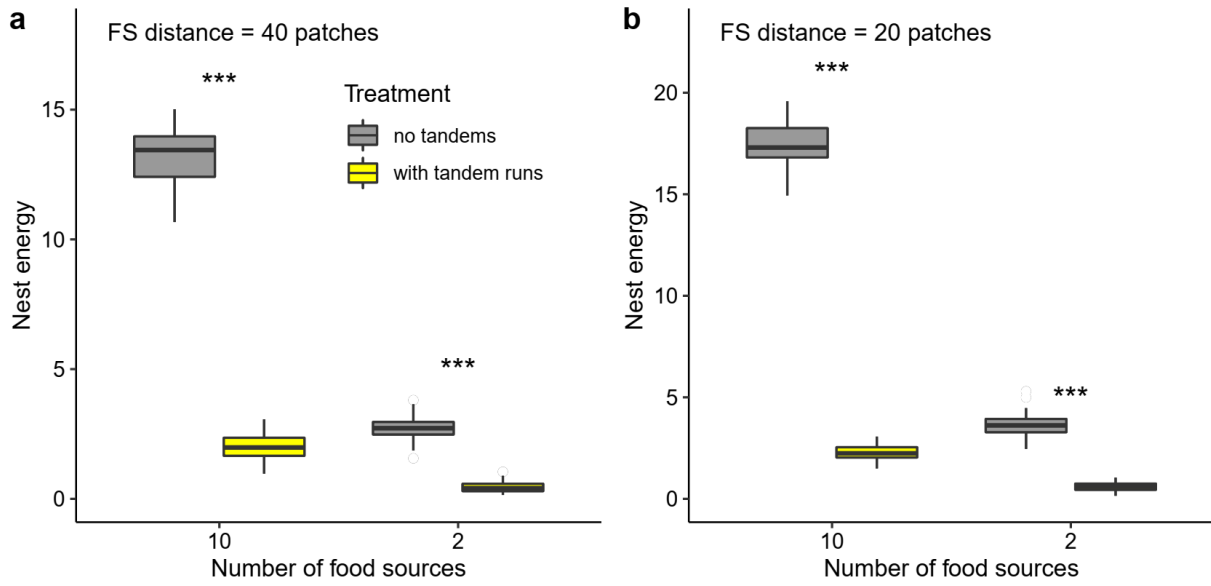

663

664 **Fig. S3.** Nest energy of colonies with or without tandem runs when all food sources are of low  
665 quality. Two food source distances were simulated, 40 patches (a) or 20 patches (b). Default  
666 values were used for all other parameters. Mann-Whitney U tests, \*\*\* $p < 0.0001$ .

667
